# Supplementary material for: MicroRNA Signatures in Malignant Pleural Mesothelioma Effusions
Source: Hindawi journal article supplement (doi:10.1155/2019/8628612), 2019-07-31
Supplement: f1 [file 8628612.f1.pdf]

**Supplementary Files:**

468 **Figure S1.** Potential microRNA biomarkers used for differentiating MPM from other  
PE 469 causing diseases were identified in PE supernatants by OpenArray profiling. The ex-  
pression 470 profiles for (a) miR-186, (b) miR-29a, (c) miR-31 and (d) miR-342-3p did not vali-  
date when 471 the microRNAs were measured by qRT-PCR. MicroRNA expression was  
plotted on a 472 logarythmic scale and U6snRNA was used as an endogenous control. The  
line within the 473 boxes represents the median values and the top and bottom of the  
boxes indicates the 474 interquartile ranges. The whiskers demonstrate the upper and lower ad-  
jacent values for each 475 sample group. \*\*  $p < 0.01$ . \*  $p < 0.05$ .

476

477

478

479

480

481

482

483

484

485

486

487

488

489

490

491

492

Figure s1

493

494

495

496

497

498

499

**a**

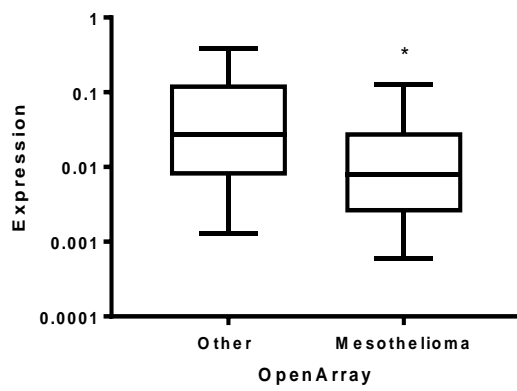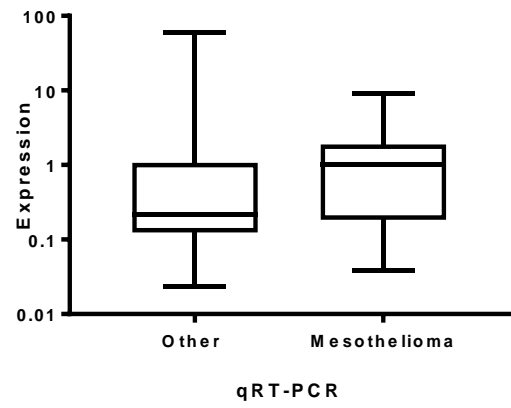

**b**

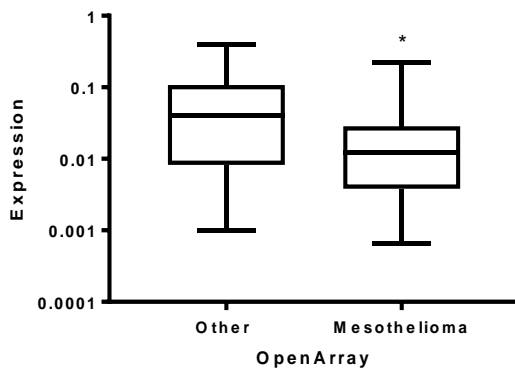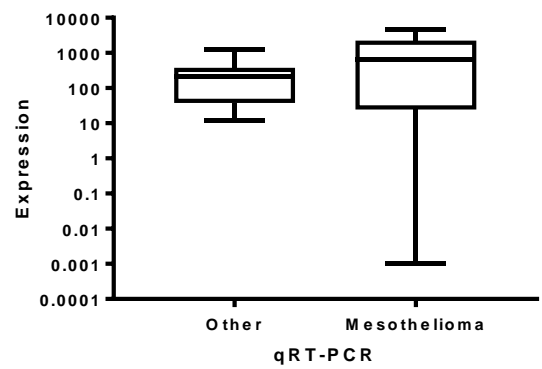

**c**

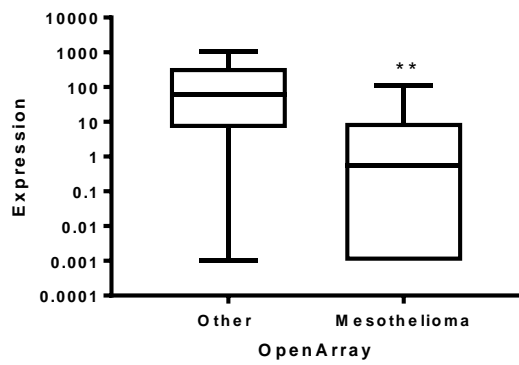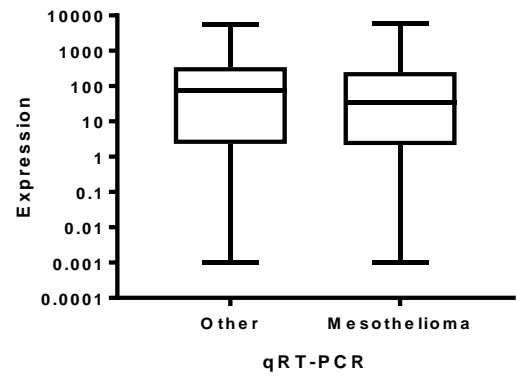

**d**

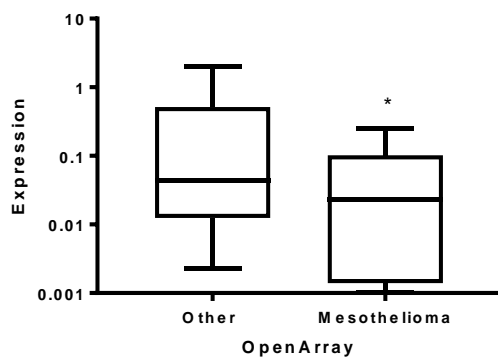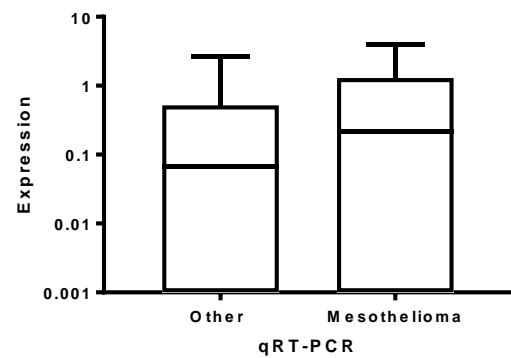

517
